# Supplementary material
Source: Springer Nature journal article supplement (https://www.springermedizin.de/resource/supplementary/12879_2012_2413_MOESM3_ESM.pdf/9444310)

# Achievement of Response to Therapy by Drug Level

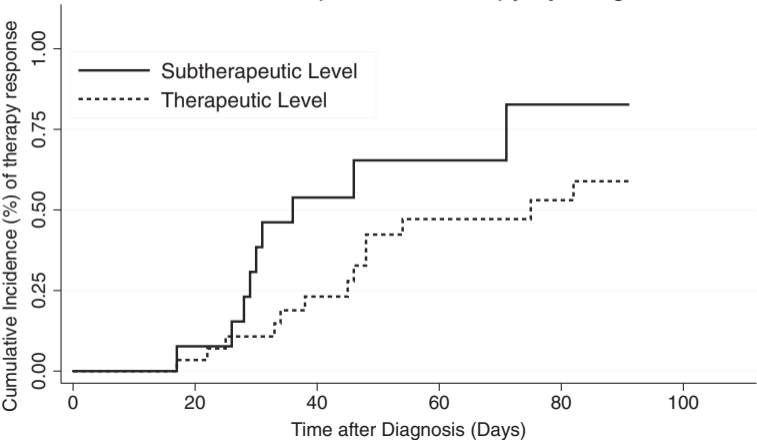

Supplement: MOESM3 [file 9444310]
